# Supplementary material
Source: Research Square preprint supplement (doi:10.21203/rs.3.rs-9416423/v1)
Supplement: Supplementary file 1 [file 572f603214817c6988605147.docx]

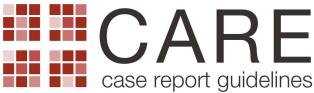
CARE Checklist of information to include when writing a case report
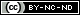


**Topic Item Checklist item description Reported on Line**

**Title 1** The diagnosis or intervention of primary focus followed by the words “case report” . . . . . . . . . . . . . . . . . . . Isolated Retroperitoneal Infection After Uncomplicated Laparoscopic Appendectomy: A Rare Case Report

**Key Words 2** 2 to 5 key words that identify diagnoses or interventions in this case report, including "case report" . . . . . . . . . . . . . Retroperitoneal infection; Laparoscopic appendectomy; Rare complication; Abscess; Percutaneous drainage; Acute suppurative appendicitis

**Abstract**

**(no references)**

**3a** Introduction: What is unique about this case and what does it add to the scientific literature? This article reports a patient with acute suppurative appendicitis and periappendicitis who underwent emergency routine laparoscopic appendectomy. The retroperitoneal space was not opened and no retroperitoneal tissue injury occurred intraoperatively; however, the patient developed severe retroperitoneal infection postoperatively.

**3b** Main symptoms and/or important clinical findings . . . . . . . . . . . . . . . . . . . . . . . . . . . . . . . . . . . . . . . . . . . . . . . . . . . On postoperative day 1, he developed persistent high fever (39.2 °C) and right lumbago. Laboratory tests showed leukocytosis (WBC 19.23×10⁹/L, neutrophil 92.80%) and elevated C-reactive protein (86.77 mg/L)

**3c** The main diagnoses, therapeutic interventions, and outcomes Retroperitoneal infection，

**3d** Conclusion—What is the main “take-away” lesson(s) from this case? Abdominal computed tomography is the key diagnostic tool. Minimally invasive drainage plus appropriate antimicrobial therapy provides excellent outcomes.

**Introduction 4** One or two paragraphs summarizing why this case is unique (**may include references**) The patient was successfully treated with computed tomography-guided percutaneous catheter drainage combined with targeted antibiotic therapy. Isolated retroperitoneal infection after uncomplicated LA is an extremely rare complication with insidious onset and non-specific symptoms. Clinicians should maintain high suspicion in patients presenting with unexplained postoperative fever and lumbago.

**Patient Information 5a** De-identified patient specific information We can provide de-identified patient specific information for your research，All shared data will be de-identified patient specific information to protect privacy.

**5b** Primary concerns and symptoms of the patient A 29-year-old male patient presented to the emergency department with migratory right lower abdominal pain for 1 day. He had no previous abdominal surgery or chronic medical illness

**5c** Medical, family, and psycho-social history including relevant genetic information Detailed medical, family and psycho-social history, together with genetic information, were obtained with no significant abnormalities

**5d** Relevant past interventions with outcomes The patient had not undergone any interventional therapy prior to hospitalization.

**Clinical Findings**

**Timeline**

**Diagnostic Assessment**

**Therapeutic Intervention**

**Follow-up and Outcomes**

1. Describe significant physical examination (PE) and important clinical findings The patient presented with cramping pain in the right lower abdomen accompanied by fever (temperature 39℃). Physical examination revealed tenderness in the right lower abdomen with localized rebound tenderness.
2. Historical and current information from this episode of care organized as a timeline The patient underwent emergency laparoscopic appendectomy on the day of admission. Abdominal CT re-examination performed 3 days postoperatively revealed retroperitoneal pneumoperitoneum and effusion, accompanied by high fever. CT-guided percutaneous abscess drainage was subsequently performed. The body temperature returned to normal on postoperative day 6. The patient was discharged on postoperative day 18 with an abdominal drainage tube in situ. The drainage tube was removed at postoperative day 33, and the patient achieved full recovery.

**8a** Diagnostic testing (such as PE, laboratory testing, imaging, surveys). Laboratory tests showed leukocytosis (WBC 19.23×10⁹/L, neutrophil 92.80%) and elevated C-reactive protein (86.77 mg/L). Abdominal computed tomography revealed a localized fluid collection and abscess in the retroperitoneum

**8b** Diagnostic challenges (such as access to testing, financial, or cultural) Retroperitoneal infection after laparoscopic appendectomy is rare.，There are multiple causes of fever following laparoscopic appendectomy, making differential diagnosis difficult.

**8c** Diagnosis (including other diagnoses considered) retroperitoneal infection（Periappendiceal abscess formation、Pelvic effusion、Appendiceal stump inflammation、Post-operative incision infection）

**8d** Prognosis (such as staging in oncology) where applicable The patient had a good prognosis without long‑term complications.

**9a** Types of therapeutic intervention (such as pharmacologic, surgical, preventive, self-care) . . . . . . . . . . . . . . . . . After admission, the patient received surgical intervention. On the 4th postoperative day, CT-guided percutaneous catheter drainage was performed.

**9b** Administration of therapeutic intervention (such as dosage, strength, duration) The patient underwent laparoscopic appendectomy. Postoperatively, CT-guided percutaneous catheter drainage was performed for retroperitoneal infection. Meanwhile, cefoperazone was administered for anti-infection therapy for a total of 14 days.

**9c** Changes in therapeutic intervention (with rationale) Simple anti-infective therapy was administered in the early postoperative period. However, the patient developed recurrent and persistent high fever with unsatisfactory therapeutic response. Abdominal computed tomography (CT) revealed retroperitoneal effusion complicated with infection. Therefore, antibiotics were upgraded, and percutaneous catheter drainage of the retroperitoneal effusion was performed simultaneously.

**10a** Clinician and patient-assessed outcomes (if available) Clinician and patient-assessed outcomes were favorable. The patient’s fever and lumbago disappeared completely, with normal inflammatory indicators and full resolution of retroperitoneal abscess on imaging；The patient was satisfied with the treatment outcome and expressed gratitude to the medical team.

**10b** Important follow-up diagnostic and other test results One month after drain removal, the patient received an outpatient follow-up abdominal CT, which showed no residual retroperitoneal effusion. Routine blood test results were within the normal range.

**10c** Intervention adherence and tolerability (How was this assessed?) The patient maintained good adherence to antimicrobial and drainage treatment.No obvious adverse reactions or intolerance occurred during the treatment

**10d** Adverse and unanticipated events No adverse or unanticipated events occurred during hospitalization and treatment

**Discussion 11a** A scientific discussion of the strengths AND limitations associated with this case report To our knowledge, isolated retroperitoneal infection after uncomplicated LA without retroperitoneal violation is extremely rare. Most reported cases of post-appendectomy retroperitoneal abscess are associated with perforated or gangrenous appendicitis, intraoperative retroperitoneal entry, retained foreign body or appendicolith, or intra-abdominal abscess extension. In the present case, the appendix was suppurative but not perforated; the retroperitoneum was not violated; and no intra-abdominal abscess was found on computed tomography. This case is unique and rarely reported in the English literature.

We propose the following mechanism for this unusual complication: (1) Purulent exudate dissected along the paracolic gutter due to periappendicitis and adhesion. (2) CO₂ pneumoperitoneum pressure promoted the tracking of infected fluid into the retroperitoneal space through anatomical gaps and fascial layers. (3) The loose areolar tissue in the retroperitoneum allowed bacterial colonization and abscess formation [8,9].

This complication is easily missed because of absent typical peritonitis signs, unremarkable intra-abdominal drain output, and symptoms mimicking postoperative fever. The key warning triad includes unexplained high fever (>39 °C), ipsilateral lumbago, and positive lumbar percussion pain. Abdominal contrast-enhanced computed tomography is the diagnostic gold standard [10].

Management principles include percutaneous drainage as the first-line treatment for retroperitoneal abscess, targeted antibiotics covering gram-negative bacilli and anaerobes, and early intervention to prevent progression to severe sepsis ；

**The main deficiencies and limitations of this report are as follows:**

Single-case study with insufficient statistical power: The therapeutic effects and clinical experience reported are only based on a single patient, which cannot be generalized to all patients with postoperative retroperitoneal infection. The applicability of this experience requires verification by more clinical data and case series studies.

Lack of detailed long-term follow-up data: Only 1-month follow-up results are provided, without long-term (3-month, 6-month) follow-up tracking. The long-term prognosis (such as recurrence risk, long-term impact on abdominal function, and quality of life) remains unclear. More detailed follow-up and evaluation indicators (e.g., quality of life scales) are needed to supplement clinical evidence.

Unclear assessment methods for adherence and tolerability: Only "good compliance" and "no obvious intolerance" are mentioned, without specifying assessment tools (e.g., medication compliance scales) or methods (e.g., patient self-report, clinical observation records), which reduces the reproducibility of the results.

Insufficient consideration of potential confounding factors: The patient’s nutritional status, immune function, and underlying diseases (e.g., diabetes, hypertension) are not discussed. These factors may affect the patient’s anti-infection ability and recovery, limiting the depth and comprehensiveness of the discussion on treatment effects.

**11b** Discussion of the relevant medical literature Isolated retroperitoneal infection after uncomplicated laparoscopic appendectomy is an extremely rare, easily misdiagnosed complication. The triad of unexplained postoperative fever, lumbago, and lumbar percussion pain should raise clinical suspicion. Abdominal computed tomography confirms the diagnosis. Computed tomography-guided percutaneous drainage combined with appropriate antimicrobial therapy is safe and effective. Awareness of this rare complication is critical for early diagnosis and prompt treatment.

**11c** The scientific rationale for any conclusions (including assessment of possible causes) Analysis of possible causes of retroperitoneal abscess: (1) Periappendicitis and adhesions lead to the spread of purulent exudate along the paracolic gutter; (2) The pressure of CO₂ pneumoperitoneum promotes the invasion of infected fluid into the retroperitoneal space through anatomical gaps and fascial layers; (3) The loose areolar tissue in the retroperitoneum provides conditions for bacterial colonization and abscess formation. Percutaneous drainage is the first-line treatment of choice; targeted antibiotics covering gram-negative bacilli and anaerobes should be selected; early intervention should be performed to prevent progression to severe sepsis.To our knowledge, isolated retroperitoneal infection after uncomplicated LA without retroperitoneal violation is extremely rare. Most reported cases of post-appendectomy retroperitoneal abscess are associated with perforated or gangrenous appendicitis, intraoperative retroperitoneal entry, retained foreign body or appendicolith, or intra-abdominal abscess extension [4–7]. In the present case, the appendix was suppurative but not perforated; the retroperitoneum was not violated; and no intra-abdominal abscess was found on computed tomography. This case is unique and rarely reported in the English literature.

We propose the following mechanism for this unusual complication:

(1) Purulent exudate dissected along the paracolic gutter due to periappendicitis and adhesions. As the acute suppurative appendicitis was complicated with periappendicitis in this case, the appendix was covered with purulent exudate on the surface. Inflammation and adhesions could lead to the spread of exudate along the paracolic gutter, which is one of the important pathways for intra-abdominal infection to spread to the retroperitoneum. Relevant literature points out that acute suppurative appendicitis can cause localized peritonitis, and its purulent exudate can spread to the retroperitoneal area along anatomical spaces such as the paracolic gutter, laying a foundation for abscess formation [14]; at the same time, tissue adhesions caused by periappendicitis can hinder the drainage of exudate, further promoting the spread of infection to the retroperitoneal space [14].

(2) CO₂ pneumoperitoneum pressure promoted the tracking of infected fluid into the retroperitoneal space through anatomical gaps and fascial layers. The carbon dioxide pneumoperitoneum established during laparoscopic surgery generates a certain abdominal pressure, which can push the infected fluid to break through the fascial barrier and invade the retroperitoneal space through the anatomical gap between the retroperitoneum and the abdominal cavity. Literature studies have shown that the pressure effect of carbon dioxide pneumoperitoneum during laparoscopic surgery may lead to the spread of intra-abdominal infectious exudate to the potential retroperitoneal space, especially when there is a basic infection such as periappendicitis, the risk of such spread is significantly increased, which is highly consistent with the pathogenesis proposed in this case [13].

(3) The loose areolar tissue in the retroperitoneum allowed bacterial colonization and abscess formation. The retroperitoneal space is rich in loose areolar tissue (adipose tissue and connective tissue). This anatomical structure lacks a dense barrier. Once infected fluid invades, it is very easy to provide a suitable environment for bacterial colonization and reproduction, and finally form an abscess. Relevant literature clearly mentions that the retroperitoneal space contains multiple potential cavities filled with loose connective tissue. This structural feature makes it prone to bacterial colonization and development into abscesses when invaded by infection, and the abscesses are not easy to be localized and tend to spread [16].

This complication is easily missed because of absent typical peritonitis signs, unremarkable intra-abdominal drain output, and symptoms mimicking postoperative fever. The key warning triad includes unexplained high fever (>39 °C), ipsilateral lumbago, and positive lumbar percussion pain. Abdominal contrast-enhanced computed tomography is the diagnostic gold standard [10].

Management principles include percutaneous drainage as the first-line treatment for retroperitoneal abscess, targeted antibiotics covering gram-negative bacilli and anaerobes, and early intervention to prevent progression to severe sepsis [11,12]. Specifically, percutaneous drainage (under ultrasound or CT guidance) is the first-line treatment for retroperitoneal abscess, which has the advantages of less trauma, accurate drainage effect and fast recovery of patients, especially suitable for single and localized retroperitoneal abscess. Literature confirms that for patients with retroperitoneal abscess without surgical contraindications, CT or ultrasound-guided percutaneous catheter drainage can effectively remove pus and control infection, which is the preferred minimally invasive treatment method in clinical practice. Its curative effect is equivalent to surgical drainage, and the complication rate is lower [15]; for complex cases that cannot be treated with percutaneous drainage, laparoscopic or open surgical drainage is considered as an alternative [15].

In terms of antibiotic treatment, the pathogenic bacteria of retroperitoneal abscess are mostly derived from intestinal flora, mainly gram-negative bacilli (such as Escherichia coli and Klebsiella) and anaerobes (such as Bacteroides fragilis). Therefore, antibiotics specifically covering such pathogenic bacteria need to be selected. Literature studies have shown that the pathogenic bacteria of intra-abdominal abscesses (including retroperitoneal abscesses) are mainly mixed flora from the intestinal tract, among which gram-negative enterobacteria and anaerobes are the most common isolated strains. Clinical treatment needs to select antibiotics that can cover both types of pathogenic bacteria, such as piperacillin-tazobactam combined with metronidazole, which can effectively control the progress of infection [17]; at the same time, antibiotic treatment needs to be adjusted according to the results of pus culture and drug sensitivity test to improve the pertinence of treatment [17].

In terms of early intervention, if the retroperitoneal abscess is not treated in time, the infection can further spread, leading to severe sepsis, septic shock and even multiple organ dysfunction syndrome. Therefore, early diagnosis and intervention are crucial. Relevant literature emphasizes that retroperitoneal abscess has an insidious onset and atypical symptoms, which is easy to be misdiagnosed. Delayed treatment will significantly increase the risk of severe complications such as sepsis. Early diagnosis through imaging examination and timely adoption of drainage + antibiotic treatment can effectively block the progress of infection, reduce the incidence of complications and improve the prognosis of patients [15].

**Citation Index**

[1] Gasman H O A, Benjamin F P E, Walter G B B. Transabdominal Laparoscopic Drainage of Post-Bariatric Retroperitoneal Abscess: A Case Report[J]. Journal of Clinical Medical Research, 2025.

[2] 中国医药信息查询平台. 急性阑尾炎[EB/OL]. 北京：国家中医药管理局名词术语规范推广项目审核, 2026. https://m.dayi.org.cn/disease/1141583.html.

[3] Anonymous. Management of Retroperitoneal Appendiceal Perforation: A Case Report[J]. Journal of Surgical Research, 2024.

[4] 中国医药信息查询平台. 腹膜后脓肿[EB/OL]. 北京：北京中医药大学东直门医院王广主任医师审核, 2026. https://m.dayi.org.cn/disease/1125933.html.

[5] Parswa Ansari, MD. Intra-Abdominal Abscesses[EB/OL]. New York: Hofstra Northwell-Lenox Hill Hospital, 2026. https://www.msdmanuals.cn/professional/gastrointestinal-disorders/acute-abdomen-and-surgical-gastroenterology/intra-abdominal-abscesses.

[6] Anonymous. Updates on the Causes, Diagnosis, and Management of Peritoneal Abscesses: A Systematic Review[J]. PMC, 2024.

[7] Anonymous. Retroperitoneal Abscess Due to Klebsiella pneumoniae Treated With Multiple Percutaneous Catheter Drainages in a Patient With Diabetes: A Case Report[J]. Semantic Scholar, 2024.

[10] 中国医药信息查询平台. 腹膜后脓肿[EB/OL]. 北京：北京中医药大学东直门医院王广主任医师审核, 2026. https://m.dayi.org.cn/disease/1125933.html.

[11] Parswa Ansari, MD. Intra-Abdominal Abscesses[EB/OL]. New York: Hofstra Northwell-Lenox Hill Hospital, 2026. https://www.msdmanuals.cn/professional/gastrointestinal-disorders/acute-abdomen-and-surgical-gastroenterology/intra-abdominal-abscesses.

[12] 中国医药信息查询平台. 腹膜后脓肿[EB/OL]. 北京：北京中医药大学东直门医院王广主任医师审核, 2026. https://m.dayi.org.cn/disease/1125933.html.

[13] Gasman H O A, Benjamin F P E, Walter G B B. Transabdominal Laparoscopic Drainage of Post-Bariatric Retroperitoneal Abscess: A Case Report[J]. Journal of Clinical Medical Research, 2025.

[14] 中国医药信息查询平台. 急性阑尾炎[EB/OL]. 北京：国家中医药管理局名词术语规范推广项目审核, 2026. https://m.dayi.org.cn/disease/1141583.html.

[15] 中国医药信息查询平台. 腹膜后脓肿[EB/OL]. 北京：北京中医药大学东直门医院王广主任医师审核, 2026. https://m.dayi.org.cn/disease/1125933.html.

[16] 中国医药信息查询平台. 腹膜后脓肿[EB/OL]. 北京：北京中医药大学东直门医院王广主任医师审核, 2026. https://m.dayi.org.cn/disease/1125933.html.

[17] Parswa Ansari, MD. Intra-Abdominal Abscesses[EB/OL]. New York: Hofstra Northwell-Lenox Hill Hospital, 2026. https://www.msdmanuals.cn/professional/gastrointestinal-disorders/acute-abdomen-and-surgical-gastroenterology/intra-abdominal-abscesses.

**11d** The primary “take-away” lessons of this case report (without references) in a one paragraph conclusion Isolated retroperitoneal infection after uncomplicated laparoscopic appendectomy is an extremely rare, easily misdiagnosed complication. The triad of unexplained postoperative fever, lumbago, and lumbar percussion pain should raise clinical suspicion. Abdominal computed tomography confirms the diagnosis. Computed tomography-guided percutaneous drainage combined with appropriate antimicrobial therapy is safe and effective. Awareness of this rare complication is critical for early diagnosis and prompt treatment.

**Patient Perspective 12** The patient should share their perspective in one to two paragraphs on the treatment(s) they received . . . . After being diagnosed with acute appendicitis, I underwent laparoscopic surgery as recommended by the doctor. Initially, I was worried about the treatment effect and whether there would be any complications. However, the medical team explained the treatment plan in detail to me, including the use of antibiotics and regular re-examinations, which relieved my anxiety significantly.

During the treatment period, the medical staff checked my physical condition every day, asked about my physical feelings in detail, and adjusted the treatment plan in a timely manner according to my recovery. When I had symptoms such as fever and back pain, the doctor quickly arranged relevant examinations and took targeted treatment measures, which effectively controlled the condition. The nursing staff were very patient and careful, answering all my doubts about the treatment and helping me build confidence in recovery.

Now, I have fully recovered and can return to my normal work and life. I am very grateful to the medical team for their professional diagnosis and careful care. This treatment experience made me realize the importance of timely medical treatment and standardized care. I hope my experience can provide some reference for other patients with similar conditions, and I also thank all the medical staff for their hard work and dedication.

**Informed Consent 13** Did the patient give informed consent? Please provide if requested . . . . . . . . . . . . . . . . . . . . . . . . . . . . . . . . . . . . . . **Yes** 🗹 **No 🞎**
